1 Investigating the efficacy of triple artemisinin-based combination  
2 therapies (TACTs) for treating *Plasmodium falciparum* malaria  
3 patients using mathematical modelling

4 Saber Dini,<sup>a</sup> Sophie Zaloumis,<sup>a</sup> Pengxing Cao,<sup>b</sup> Ric N Price,<sup>c,d</sup> Freya J.I. Fowkes,<sup>a,e,f</sup>  
5 James M McCaw,<sup>a,b,g,h</sup> Julie A Simpson<sup>a,#</sup>

6 <sup>a</sup> Centre for Epidemiology and Biostatistics, Melbourne School of Population and  
7 Global Health, University of Melbourne, Melbourne, Australia

8 <sup>b</sup> School of Mathematics and Statistics, University of Melbourne, Melbourne, Australia

9 <sup>c</sup> Global and Tropical Health Division, Menzies School of Health Research and Charles  
10 Darwin University

11 <sup>d</sup> Centre for Tropical Medicine and Global Health, Nuffield Department of Clinical  
12 Medicine, University of Oxford

13 <sup>e</sup> Burnet Institute, Disease Elimination Program, Public Health, Melbourne, Australia

14 <sup>f</sup> Department of Epidemiology and Preventative Medicine and Department of Infectious  
15 Diseases, Monash University, Melbourne, Australia

16 <sup>g</sup> Peter Doherty Institute for Infection and Immunity, The Royal Melbourne Hospital  
17 and University of Melbourne, Melbourne, Australia

18 <sup>h</sup> Murdoch Children's Research Institute, The Royal Children's Hospital, Melbourne,  
19 Australia

20 Running Head: Mathematical Modelling of TACT

21 #Address correspondence to Julie A. Simpson, [julieas@unimelb.edu.au](mailto:julieas@unimelb.edu.au).

22

## Abstract

23 The first line treatment for uncomplicated falciparum malaria is artemisinin-based com-  
24 bination therapy (ACT), which consists of an artemisinin derivative co-administered with  
25 a longer acting partner drug. However, the spread of *Plasmodium falciparum* resistant  
26 to both artemisinin and its partner drugs poses a major global threat to malaria control  
27 activities. Novel strategies are needed to retard and reverse the spread of these resistant  
28 parasites. One such strategy is triple artemisinin-based combination therapy (TACT).  
29 We developed a mechanistic within-host mathematical model to investigate the efficacy of  
30 a TACT (dihydroartemisinin-piperaquine-mefloquine - DHA-PQ-MQ), for use in South-  
31 East Asia, where DHA and PQ resistance are now increasingly prevalent. Comprehensive  
32 model simulations were used to explore the degree to which the underlying resistance in-  
33 fluences the parasitological outcomes. The effect of MQ dosing on the efficacy of TACT  
34 was quantified at varying degrees of DHA and PQ resistance. To incorporate interactions  
35 between drugs, a novel model is presented for the combined effect of DHA-PQ-MQ, which  
36 illustrates how the interactions can influence treatment efficacy. When combined with a  
37 standard regimen of DHA and PQ, the administration of three 8.3 mg/kg doses of MQ  
38 was sufficient to achieve parasitological efficacy greater than that currently recommended  
39 by WHO guidelines.

## 40 Introduction

41 Over the last decade, significant gains have been made towards the control and elimina-  
42 tion of malaria. Despite this progress, almost half a billion people still die from malaria

43 each year. Disturbingly, in 2016 there were five million more cases of malaria than the  
44 previous year (2017 WHO report (1)), emphasising the fragile nature of malaria control.  
45 Early diagnosis and treatment with highly effective antimalarial drug regimens remains  
46 central to all national malaria control activities. Artemisinin-based combination thera-  
47 pies (ACTs) are the first line therapy in almost all malaria endemic countries, due to  
48 their high efficacy, tolerability and ability to reduce ongoing transmission of the para-  
49 site. ACTs are comprised of two components: an artemisinin derivative and a partner  
50 drug. The artemisinin derivative has a high antimalarial potency, killing a large propor-  
51 tion of parasites, however, these compounds are rapidly eliminated, leaving a residual  
52 parasite population that, if left untreated, will likely recrudescence. A slowly eliminated,  
53 partner drug, is required to provide a sustained antimalarial activity, capable of killing  
54 the remaining parasites (2).

55 ACTs have remained highly efficacious for almost two decades, but are now under  
56 threat from the emergence of drug resistant parasites (2, 3). In 2009, a high proportion  
57 of patients with markedly delayed parasite clearance were reported from the western re-  
58 gion of Cambodia, and this was confirmed as being attributable to artemisinin resistance  
59 (3). These parasites have now spread across the Greater Mekong Region (4, 5). Delayed  
60 parasite clearance and higher gametocyte carriage, due to the artemisinin derivative re-  
61 sistance, drive selection of resistance to the partner drug (6), and in South-East Asia, this  
62 has resulted in declining efficacy of all the ACTs currently recommended by WHO (7). In  
63 some parts of the Greater Mekong Region, the spread of highly drug resistant parasites  
64 poses a major threat to malaria control activities. The emergence of an untreatable *P.*  
65 *falciparum* will result in an inevitable rise in malaria incidence, epidemics and associated

66 morbidity and mortality.

67 The development of alternative strategies is crucial to ensuring the ongoing success  
68 of malaria control efforts. Triple Artemisinin-based Combination Therapy (TACT) is  
69 a novel strategy by which a new partner drug is added to an established ACT. TACT  
70 has the potential to prevent the emergence of a *de novo* resistance as well as rescuing a  
71 regimen in which one of the ACT components is already failing. Two antimalarial clinical  
72 trials are underway to determine the efficacy of TACT for uncomplicated falciparum  
73 malaria: Artemether-Lumefantrine plus Amodiaquine (AL-AQ) and Dihydroartemisinin-  
74 Piperaquine plus Mefloquine (DHA-PQ-MQ). These are being compared to the standard  
75 ACTs (AL and DHA-PQ) alone (see trial number NCT02453308 in [clinicaltrials.gov](https://clinicaltrials.gov)).

76 In this work, we developed a within-host mathematical model (8) to explore the  
77 efficacy of TACTs, with a particular focus on DHA-PQ-MQ, since DHA-PQ is widely  
78 administered in South-East Asia, and is currently associated with very high failure rates  
79 in some regions (9, 10, 11). The model accommodates a high level of biological details,  
80 such as drug-drug interaction (12, 13), stage-specificity of parasite killing (14, 15, 16,  
81 17) and between-patient and between-isolate variability (17). We used the model to  
82 simulate different levels of resistance and quantify the degree to which this compromises  
83 the efficacy of TACT. The optimal MQ dosing regimen was determined for various degrees  
84 of resistance to DHA-PQ.

## 85 Results

86 Simulated drug concentrations and parasite burden are shown in Fig. 1. The median  
87 concentration of the drugs (lines) along with the between-subject variabilities (the shaded  
88 regions show the area between the 2.5% and 97.5% percentiles) are presented in Fig. 1a,  
89 and the parasitaemia of 100 randomly selected patients in Fig. 1b. Fig. 1c presents  
90 the Kaplan-Meier estimation of the probability of cure, along with the 95% confidence  
91 intervals illustrated by the shaded region.

92 Parasite resistance to antimalarial drugs can manifest in a couple of different ways  
93 that affect the killing profile of a drug (see the concentration-effect curves in Fig. 2  
94 (18)). These include i) increasing  $EC_{50}$  (the red curve), ii) reducing the size of the killing  
95 window in the intra-erythrocytic parasite life-cycle, and iii) decreasing  $\gamma$  and/or  $E_{max}$   
96 (the blue curve). The degree of resistance was modelled initially by varying  $EC_{50}$  of PQ,  
97 in scenarios where the parasites are sensitive or resistant to DHA. The influence of other  
98 manifestations of resistance on TACT efficacy are outlined in Supplementary Material 1.

99 The level of resistance and the resultant risk of treatment failure varies with geo-  
100 graphical region. Table 1 demonstrates a large variation in DHA-PQ efficacy in different  
101 regions across South-East Asia (19). The risk of failures in Aoral and Chi Kraeng in  
102 Cambodia are 51.9% and 62.5% treatment failures, respectively, whereas in Siem Pang it  
103 is only 8.3%. Similar large variations in the probability of treatment failure are observed  
104 in Vietnam. According to the WHO treatment guidelines, when the risk of failure ex-  
105 ceeds 10%, a treatment is considered suboptimal, and steps should be taken to change  
106 the policy to a more efficacious antimalarial regimen.

## 107 Sensitivity to DHA

108 In the first investigated scenario, the parasites were assumed sensitive to DHA (sampling  
109 interval of  $EC_{50,D}$  was limited to  $(0, 10]$  ng/ml), and resistance level to PQ was varied.  
110 Fig. 3a shows how the probability of cure at day 42 of follow-up varies with  $EC_{50}$  of  
111 PQ over the deciles of  $(11, 94]$  ng/ml. The top labels in this figure show the geographical  
112 regions in South-East Asia (Table 1) that have observed DHA-PQ day 42 cure rates equal  
113 to the corresponding simulated values (19).

114 The probability of cure declines as  $EC_{50}$  of PQ increases. Without MQ, the probability  
115 of cure with DHA-PQ is below 90%, over  $EC_{50,P} \in (36, 94]$ , which includes Binh Phuoc  
116 and Bu Gia Map. This scenario was unable to produce the probabilities of cure observed  
117 in all of the geographical regions, shown in Table 1.

118 The addition of a single 8.3 mg/kg dose of MQ on day 3 significantly raised the  
119 probability of cure. Day 3 administration of MQ was chosen, since at this time patients  
120 are clinically better, the drug is better tolerated and bioavailability is higher (20). The  
121 improvement in efficacy with a single dose of MQ was insufficient to ensure successful  
122 treatment in Bu Gia Map. In this region, a second dose at day 2 was required. When the  
123 parasites are sensitive to DHA, but resistant to PQ, two doses of MQ on days 2 and 3  
124 were sufficient to achieve cure in all locations. Administration of three doses of MQ did  
125 not provide significant benefit over a two dose MQ regimen, although might be used to  
126 guarantee the success of the TACT.

## 127 **Resistance to DHA**

128 Concurrent resistance to DHA and PQ is now documented in Cambodia and Vietnam  
129 (9). To simulate a high level of DHA resistance, we set  $EC_{50,D} \in (50, 100]$  ng/ml, and  
130 varied the intensity of resistance to PQ,  $EC_{50,P} \in (11, 94]$  ng/ml. Using the same dosing  
131 regimens as those in Fig. 3a, resistance to DHA leads to a significant decline in the  
132 efficacy of DHA-PQ, as shown in Fig. 3b. When combined with a single 8.3 mg/kg dose  
133 of MQ, the efficacy of the TACT was improved significantly, but except for Siem Pang,  
134 it was clearly not sufficient.

135 Administration of MQ on days 2 and 3 provided sufficient efficacy in Binh Phuoc and  
136 Bu Gia Map, but was still insufficient for Aoral and Chi Kraeng. An additional dose of  
137 MQ was needed on day 1 to obtain a successful treatment in all of the regions. Note  
138 that administering 8.3 mg/kg of MQ over three days (25 mg/kg in total) is currently the  
139 recommended dosing regimen by WHO for the ACT of MQ plus artesunate (18).

## 140 **The influence of the antagonistic PQ-MQ interaction**

141 The effect of the PQ-MQ interaction parameter,  $\alpha$ , on the probability of cure was then  
142 investigated. Fig. 4a shows the combined killing effect of the drugs,  $E$ , over time for a  
143 selected patient with two different values of the interaction parameter:  $\alpha = 3.3$  (antago-  
144 nism) and  $\alpha = 1$  (zero-interaction); the other parameters were kept constant. The killing  
145 effect for  $\alpha = 1$  (solid line) is significantly higher than that for  $\alpha = 3.3$  (dashed line),  
146 indicating the extent to which the drugs can nullify each other's effect, and the loss in  
147 the overall efficacy of TACT.

148 The effect of the interaction parameter,  $\alpha$ , on the efficacy was further assessed by  
149 restricting the resistance level to that corresponding to Chi Kraeng ( $EC_{50,P} \in (69, 78]$ )  
150 and estimating the probability of cure for different values of  $\alpha$ ; DHA resistance is also  
151 assumed. The results demonstrated a significant difference between the probabilities of  
152 cure at different values of  $\alpha$ ; Fig. 4b. For example, when  $\alpha < 1$  (synergism), one dose  
153 of MQ was enough to provide 90% efficacy. In contrast, when  $\alpha > 1$  (antagonism) the  
154 probability of cure fell well below 90%. Similarly, the probability of cure declined with  
155 increasing  $\alpha$  (*i.e.* antagonism intensification) for MQ administration on days 2 and 3  
156 and on days 1, 2 and 3. Of note, the three 8.3 mg/kg doses of MQ achieved greater  
157 than 90% efficacy at all values of  $\alpha$ , even at levels indicative of very strong antagonism.  
158 This highlights the robustness of this dosing regimen in producing a successful treatment.  
159 The antagonism between PQ and MQ had an important impact on the efficacy of the  
160 TACT, and neglecting this may result in an underestimation of the dose of MQ required  
161 for successful treatment across different regions.

162 The effect of other manifestations of resistance on the efficacy of the TACT are il-  
163 lustrated in Supplementary Material 1. Fig. S1 presents the probability of survival at  
164 different levels of resistance produced by varying maximum killing effect of PQ,  $E_{max,P}$ .  
165 Similar to the case where  $EC_{50}$  was the manifestation of resistance, shown in Fig. 3, the  
166 results indicate that the three 8.3 mg/kg doses of MQ are sufficient to provide the desir-  
167 able probability of cure at every level of resistance. The outcomes were consistent when  
168 the killing window of PQ was shortened, as shown in Fig. S2. However, the probability  
169 of cure became extremely low, when resistance was high. Nevertheless, three 8.3 mg/kg  
170 doses of MQ overcame high levels of resistance and ensured high probability of cure.



## 171 Discussion

172 We have presented a novel mathematical model to investigate the efficacy of different  
173 regimens for triple artemisinin combination therapies (TACTs). Our analysis focused on  
174 DHA-PQ-MQ, since DHA-PQ is a widely used ACT in South-East Asia with declining  
175 efficacy in several locations (9, 10, 11). The addition of MQ to DHA-PQ has potential  
176 to improve treatment, since the ACT of artesunate-MQ retains high efficacy, following  
177 its reintroduction as a first-line treatment in Cambodia (7). Our results suggest that  
178 a single dose of MQ can improve the treatment efficacy of DHA-PQ significantly, and  
179 would be an appropriate regimen for regions such as Siem Pang in Cambodia and Binh  
180 Phuoc in Viet Nam. However, it is likely to be insufficient in regions where there is  
181 pre-existing high grade resistance to PQ, such as Bu Gia Map in Viet Nam and Aoral  
182 and Chi Kraeng in Cambodia. The addition of two doses of MQ would be beneficial, but  
183 efficacy would still be compromised in the regions where there was high level of resistance  
184 to both PQ and DHA, such as Chi Kraeng. To achieve a cure rate of greater than 90%,  
185 as recommended by the WHO, three doses of MQ (8.3 mg/kg) need to be administered  
186 in conjunction with the standard three days regimen of DHA-PQ. Such a dose of MQ,  
187 has already been shown to be well tolerated and safe, and is recommended in the WHO  
188 treatment guidelines (18).

189 Our model enabled us to simulate the PK and PD following TACT administration  
190 to patients with malaria, and provided important insights into the way in which the  
191 underlying mechanisms of drug action affect treatment efficacy. By taking account of  
192 between-patient and between-isolate variability, we were able to explore treatment efficacy

193 across a wide range of different scenarios reflecting varying parasite resistance to the  
194 different drug components. The results showed similar trends for different resistance  
195 manifestations, confirming the robustness of the proposed dosing regimen of DHA-PQ-  
196 MQ.

197 We have proposed a novel empirical model to accommodate the effect of the combined  
198 drugs, assuming that PQ and MQ (both quinoline compounds) have similar modes of  
199 action, which differs from that of DHA (an endoperoxide compound). The killing effects  
200 of PQ-MQ and DHA were therefore assumed to be independent. This justified using a  
201 combination of Bliss independence and Loewe additivity to define the combined effect of  
202 the whole compound (see Eqn. (1)).

203 To facilitate the dissemination of our model and assist clinical researchers to investi-  
204 gate how different PK and PD parameters and dosing schemes influence parasitological  
205 outcomes, we have produced an online application that allows varying the values of pa-  
206 rameters and simulating the model: [appTACT](#). By predicting the fate of malaria infection  
207 in patients, the online application can provide a means for *e.g.* estimating the required  
208 sample size of an antimalarial clinical efficacy study.

209 Our mathematical model can be used to guide the development of suitable TACT  
210 regimens for investigation in clinical trials. Determining dosing regimens that are robust  
211 to a wide range of scenarios helps rationalize the logistical and financial challenges of  
212 phase 2 and 3 clinical trials. Further improvements in the model can be made to increase  
213 its fidelity to the underlying biology. For instance, by consideration of the artemisinin  
214 PK (*e.g.* bioavailability) dependence on parasite density (21) and different bioavailability

215 of MQ at different administered days (20). The PD model can also be improved by  
216 incorporating more complexities underlying drug action, such as the dependence of killing  
217 effect on the timespan parasites are exposed to drugs (22, 23, 24, 25). However, in  
218 this initial analysis, we aimed to focus on the generality of the model and leave these  
219 modifications for future studies. Although we did not explore the degree to which the  
220 efficacy of TACT influenced other aspects of malaria control, such as the transmissibility  
221 of the parasite, this certainly warrants further investigation, since a more comprehensive  
222 perspective will be needed on the suitability of deploying TACT in areas of high drug  
223 resistance.

## 224 **Materials and Methods**

### 225 **Mathematical Model**

226 The pharmacokinetic-pharmacodynamic (PK-PD) model presented in Zaloumis et al.  
227 2012 (17) was used to model the dynamics of drug concentrations and parasite burden  
228 within an individual. In brief, this model describes the time-evolution of the number of  
229 parasites in the body,  $N$ , by the following difference equations:

$$N(a, t) = \begin{cases} N(a-1, t-1) (1 - E(a-1, t-1)), & 1 < a \leq 48, \\ N(48, t-1) (1 - E(48, t-1)) \times \text{PMF}, & a = 1, \end{cases}$$

230 where  $a$  is the parasites' age, taking only integer values over  $[1, 48]$ ,  $t$  is time and PMF  
231 is the parasite multiplication factor, which represents the number of merozoites released

232 into blood by a shizont at the end of its lifecycle.  $E(a, t)$  is the combined killing effect of  
233 the drugs, and has been modified from that presented in Zaloumis et al. 2012 to account  
234 for three drugs and accommodate drug interactions. The combined killing effect of the  
235 drugs is between 0 and 1, and dependent upon the age of parasites during  $[t, t + 1)$ . The  
236 number of detectable parasites circulating in the blood,  $M(t)$ , is determined by

$$M(t) = \sum_{a=1}^{48} N(a, t)g(a),$$

237 where  $g(a)$  accounts for the reduction in the number of circulating parasites in the blood  
238 due to sequestration, estimated to be

$$g(a) = \begin{cases} 1, & a < 11, \\ 2^{\frac{11-a}{3}}, & a \geq 11, \end{cases}$$

239 where we assumed sequestration begins at age 11 and intensifies with age (16, 26). In the  
240 ensuing section, we explain the details of modelling the combined effect of the drugs,  $E$ .

241 The PK models for the three drugs considered, DHA, PQ and MQ, are well charac-  
242 terized; one-compartment models were used for DHA and MQ and a two-compartment  
243 model for PQ (27, 28, 29). The PK parameter values are drawn from the literature and  
244 provided in Table 2.

## 245 **Combined killing effect of the drugs**

246 The combined killing effect of the drugs is modulated by the manner in which they interact  
247 with each other. Synergistic interaction between drugs produces a stronger combined

248 effect compared to the case where they do not interact, *i.e.* zero-interaction (also known  
249 as pure additivity). Conversely, antagonistic drug-drug interactions can nullify their  
250 additive effect, and produce a lower combined effect than that for the zero-interaction  
251 case. Therefore, to model the combined effect,  $E$ , we must first identify how the drugs  
252 interact.

253 An empirical approach was taken, modelling zero-interaction as the reference (null)  
254 model (30, 31, 32), since the mechanisms underlying the killing effects are complex and  
255 not completely understood (33). Among the existing empirical approaches of modelling  
256 zero-interaction, two are more prominent and widely used: *Loewe additivity* (34) and  
257 *Bliss independence* (35). Loewe additivity is suggested to be a suitable concept for zero-  
258 interaction when non-interacting drugs have similar modes of action, however, when the  
259 drugs are believed to act independently, Bliss independence is more appropriate (31, 32).

260 It has been suggested that MQ and PQ kill parasites through a similar mechanism,  
261 involving the disruption of haem detoxification in the parasite vacuole (33, 36, 37). DHA  
262 has a different mode of action, which involves the generation of free radicals and reactive  
263 intermediates that target various proteins of parasites (36, 38, 39). The PK and PD  
264 interactions of DHA with PQ and MQ appear to be negligible (13).

265 The independent mechanisms of action of DHA and PQ-MQ justifies using the Bliss  
266 independence concept for modelling the combined killing effect,  $E$ , given by

$$E = E_D + E_{PM} - E_D E_{PM}, \quad (1)$$

267 where  $E_D$  is the killing effect of DHA and  $E_{PM}$  is the combined effect of PQ and MQ.

268 We assume Michaelis-Menten kinetics for  $E_D$ :

$$E_D = E_{max,D} \frac{C_D^{\gamma_D}}{C_D^{\gamma_D} + EC_{50,D}^{\gamma_D}} \mathbf{1}_{W_D}(a),$$

269 where  $E_{max,D}$  is the maximum killing effect of DHA;  $C_D$  is DHA concentration;  $EC_{50,D}$   
270 is the concentration at which 50% of the maximum killing effect is obtained;  $\gamma_D$  is the  
271 sigmoidicity (also known as slope) of the concentration-effect curve;  $\mathbf{1}_W(a)$  is an indicator  
272 function, used to implement the age-specific killing of drugs, defined by

$$\mathbf{1}_W(a) = \begin{cases} 1, & a \in W, \\ 0, & \text{otherwise,} \end{cases}$$

273 where  $W$  is the age window (interval) where the antimalarial drugs are able to kill the  
274 parasites;  $W_D$  is the killing window of DHA.

275 To define  $E_{PM}$ , models incorporating the Loewe additivity concept (as PQ and MQ  
276 have similar modes of action) were used, which include only one parameter for the effect  
277 of the interaction between PQ and MQ (31, 32, 40). These models are more specified  
278 to the framework of drug interaction, in contrast to the statistical models that usually  
279 have multiple parameters (41, 42, 43). A detailed description of the examined models is  
280 provided in Supplementary Material 2. The final model selected was a combination of  
281 the models described in Tallarida 2006 (32) and Machado, Robinson 1994 (40):

$$E_{PM} = E_{max,P} \frac{C_{PM}^{\gamma_{PM}}}{C_{PM}^{\gamma_{PM}} + EC_{50,P}^{\gamma_{PM}}},$$

282 where

$$C_{PM} = (C_P^\alpha \mathbf{1}_{W_P}(a) + C_{eq,M}^\alpha \mathbf{1}_{W_M}(a))^\frac{1}{\alpha}, \quad (2)$$

283 and

$$C_{eq,M} = E_P^{-1}(E_M(C_M)),$$

284 where  $E_M$  is the killing effect of MQ and  $E_P^{-1}$  is the inverse of the killing effect of PQ,

285 given by

$$E_P^{-1}(x) = EC_{50,P} \left( \frac{x}{E_{max,P} - x} \right)^\frac{1}{\gamma_P},$$

286 where  $E_{max,P}$  and  $EC_{50,P}$  are the maximum killing effect of PQ and the concentration at

287 which half of the maximum killing effect is produced, respectively;  $W_P$  and  $W_M$  are the

288 killing windows of PQ and MQ, respectively. Zero-interaction is produced by Eqn. (2)

289 when  $\alpha = 1$ ; the values of  $1 < \alpha < \infty$  and  $0 < \alpha < 1$  produce antagonism and synergism,

290 respectively. Note that PQ is considered to be more potent than MQ; see Supplementary

291 Material 2 for further information.

292 Isobolograms, widely used in pharmacology and toxicology studies, can inform on the

293 nature of drug-drug interactions. These present data on the parasiticidal effect of paired

294 drug concentrations. The combination of drug concentrations is then compared with the

295 zero-interaction isobole (also known as linear isobole) (44); see Fig. 5a. When the pairs

296 of drugs concentrations are close to the linear isobole, zero-interaction is inferred, and

297 when they lie significantly above or below the linear isobole, antagonism or synergism

298 can be inferred, respectively.

299 Using this approach, Davis et al. 2006 (13) showed that the paired PQ and MQ data

300 were significantly above the zero-interaction isobole (dashed line), indicating a strong  
301 antagonistic interaction between PQ and MQ; Fig. 5a. The combined killing effect of PQ-  
302 MQ,  $E_{PM}$ , was fitted to this data, and PQ-MQ interaction parameter was estimated to be  
303  $\alpha = 3.3$ . Fig. 5b shows predicted  $E_{PM}$  for  $\alpha = 3.3$  for varying PQ and MQ concentrations.  
304 The killing effects of DHA and PQ-MQ were applied to Eqn. (1) to estimate the combined  
305 effect of DHA-PQ-MQ and simulate the PD model; see Supplementary Material 2 for  
306 further details.

## 307 Model simulation

308 Latin Hypercube Sampling (LHS) was used to efficiently sample the parameter space  
309 (45), and simulate the PK profiles and parasitological responses. The distributions of the  
310 parameter values of the PK and PD models are presented in Tables 2 and 3, respectively.  
311 A triangular distribution was used for generating samples of  $\alpha$ , with a peak at  $\alpha = 3.3$ ,  
312 estimated by fitting the model to the data, as explained in the previous section. The  
313 lower and upper bounds were selected to be 1 (zero-interaction) and 16 (very strong  
314 antagonism), respectively. The initial parasite burden was assumed to have a log-normal  
315 distribution with a geometric mean of  $1.14 \times 10^{11}$  and standard deviation of 1.13 on the  
316 log-scale; Table 3.

317 The probability of cure (*i.e.* 1 - probability of failure) was used as a measure of drug  
318 efficacy, and Kaplan-Meier survival analysis was carried out on the simulated parasite  
319 versus time profiles of the patients, to estimate the probabilities of cure at day 42 of follow-  
320 up. Treatment failure was defined as parasite recrudescence, in which the peripheral



321 parasitaemia exceeded the microscopic limit of detection (50 parasite per  $\mu\text{L}$  or a total  
322 parasite biomass of  $2.5 \times 10^8$ ).

323 Dosing regimens recommended by WHO were used in the simulations. These included  
324 18.0 mg/kg/day of PQ and 4.0 mg/kg/day of DHA for three days. Current guidelines  
325 recommend a total dose of 25 mg/kg MQ in combination with 4mg/kg/day of artesunate  
326 (18). Splitting the dose of MQ (8.3 mg/kg/day for three days) improves the bioavailability  
327 of MQ, is better tolerated and and has a greater efficacy (46). Higher daily doses of MQ  
328 are associated with significant side-effects (47), and thus modelling explored the minimum  
329 dosage of MQ that results in optimal efficacy. Hence, the number of days in which a 8.3  
330 mg/kg dose of MQ was administered was varied and the corresponding TACT efficacy  
331 was estimated.

332 To simulate different degrees of PQ and DHA resistance,  $EC_{50}$ ,  $E_{max}$  and  $W$  were  
333 varied over the limited sampling intervals of the range of values given in Table 3. Different  
334 scenarios were considered, simulating resistance to DHA and/or PQ.

## 335 Acknowledgments

336 This work was supported by the NHMRC Centres for Research Excellence in Malaria  
337 Elimination (1134989) and Infectious Diseases Modelling to Inform Public Health Pol-  
338 icy (1078068), an NHMRC Project Grant (1100394) and an ARC Discovery Project  
339 (DP170103076). FJIF was supported by Australian Research Council Future Fellow-  
340 ship. RNP is a Wellcome Trust Senior Fellow in Clinical Science (200909), and JAS is a  
341 NHMRC Senior Research Fellow (1104975).

## 342      **References**

- 343      1. WHO. 2017. World Malaria Report. World Health Organisation. URL: [http://www.](http://www.who.int/malaria/publications/world-malaria-report-2017/en/)  
344      [who.int/malaria/publications/world-malaria-report-2017/en/](http://www.who.int/malaria/publications/world-malaria-report-2017/en/).
- 345      2. Fairhurst RM, Dondorp AM. 2016. Artemisinin-resistant *Plasmodium falciparum*  
346      malaria. Microbiol Spectr 4.
- 347      3. Dondorp AM, Nosten F, Yi P, Das D, Phyto AP, Tarning J, Lwin KM, Ariey F,  
348      Hanpithakpong W, Lee SJ, Ringwald P, Silamut K, Imwong M, Chotivanich K, Lim  
349      P, Herdman T, An SS, Yeung S, Singhasivanon P, Day NPJ, Lindegardh N, Socheat  
350      D, White NJ. 2009. Artemisinin resistance in *Plasmodium falciparum* malaria. N  
351      Engl J Med 361:455–467.
- 352      4. Ashley EA, Dhorda M, Fairhurst RM, Amaratunga C, Lim P, Suon S, Sreng S,  
353      Anderson JM, Mao S, Sam B, Sopha C, Chuor CM, Nguon C, Sovannaroeth S,  
354      Pukrittayakamee S, Jittamala P, Chotivanich K, Chutasmit K, Suchatsoonthorn C,  
355      Runcharoen R, Hien TT, Thuy-Nhien NT, Thanh NV, Phu NH, Htut Y, Han KT,  
356      Aye KH, Mokuolu OA, Olaosebikan RR, Folaranmi OO, Mayxay M, Khanthavong  
357      M, Hongvanthong B, Newton PN, Onyamboko MA, Fanello CI, Tshefu AK, Mishra  
358      N, Valecha N, Phyto AP, Nosten F, Yi P, Tripura R, Borrmann S, Bashraheil M,  
359      Peshu J, Faiz MA, Ghose A, Hossain MA, Samad R, Rahman MR, Hasan MM,  
360      Islam A, Miotto O, Amato R, MacInnis B, Stalker J, Kwiatkowski DP, Bozdech Z,  
361      Jeeyapant A, Cheah PY, Sakulthaew T, Chalk J, Intharabut B, Silamut K, Lee SJ,  
362      Vihokhern B, Kunasol C, Imwong M, Tarning J, Taylor WJ, Yeung S, Woodrow  
363      CJ, Flegg JA, Das D, Smith J, Venkatesan M, Plowe CV, Stepniewska K, Guerin

- 364 PJ, Dondorp AM, Day NP, White NJ. 2014. Spread of artemisinin resistance in  
365 *Plasmodium falciparum* malaria. N Engl J Med 371:411–423.
- 366 5. Tun KM, Imwong M, Lwin KM, Win AA, Hlaing TM, Hlaing T, Lin K, Kyaw MP,  
367 Plewes K, Faiz MA, Dhorda M, Cheah PY, Pukrittayakamee S, Ashley EA, An-  
368 derson TJC, Nair S, McDew-White M, Flegg JA, Grist EPM, Guerin P, Maude  
369 RJ, Smithuis F, Dondorp AM, Day NPJ, Nosten F, White NJ, Woodrow CJ.  
370 2015. Spread of artemisinin-resistant *Plasmodium falciparum* in Myanmar: a cross-  
371 sectional survey of the K13 molecular marker. Lancet Infect Dis 15:415–421.
- 372 6. Amato R, Lim P, Miotto O, Amaratunga C, Dek D, Pearson RD, Almagro-Garcia J,  
373 Neal AT, Sreng S, Suon S, Drury E, Jyothi D, Stalker J, Kwiatkowski DP, Fairhurst  
374 RM. 2017. Genetic markers associated with dihydroartemisinin-piperaquine failure  
375 in *Plasmodium falciparum* malaria in Cambodia: a genotype-phenotype association  
376 study. Lancet Infect Dis 17:164–173.
- 377 7. WHO. 2017. Artemisinin and artemisinin-based combination therapy resistance.  
378 World Health Organization. URL: [www.who.int/malaria/publications/atoz/  
379 artemisinin-resistance-april2017/en/](http://www.who.int/malaria/publications/atoz/artemisinin-resistance-april2017/en/).
- 380 8. Simpson JA, Zaloumis S, DeLivera AM, Price RN, McCaw JM. 2014. Making the  
381 most of clinical data: reviewing the role of pharmacokinetic-pharmacodynamic mod-  
382 els of anti-malarial drugs. AAPS J 16:962–974.
- 383 9. Amaratunga C, Lim P, Suon S, Sreng S, Mao S, Sopha C, Sam B, Dek D, Try  
384 V, Amato R, Blessborn D, Song L, Tullo GS, Fay MP, Anderson JM, Tarning  
385 J, Fairhurst RM. 2016. Dihydroartemisinin-piperaquine resistance in *Plasmodium*

- 386 *falciparum* malaria in Cambodia: a multisite prospective cohort study. *Lancet Infect*  
387 *Dis* 16:357–365.
- 388 10. Leang R, Taylor WRJ, Bouth DM, Song L, Tarning J, Char MC, Kim S, Witkowski  
389 B, Duru V, Domergue A, Khim N, Ringwald P, Ménard D. 2015. Evidence of *Plas-*  
390 *modium falciparum* malaria multidrug resistance to artemisinin and piperazine in  
391 western Cambodia: dihydroartemisinin-piperazine open-label multicenter clinical  
392 assessment. *Antimicrob Agents Chemother* 59:4719–4726.
- 393 11. Phuc BQ, Rasmussen C, Duong TT, Dong LT, Loi MA, Ménard D, Tarning J,  
394 Bustos D, Ringwald P, Galappaththy GL, Thieu NQ. 2017. Treatment failure of di-  
395 hydroartemisinin/piperazine for *Plasmodium falciparum* malaria, Vietnam. *Emerg*  
396 *Infect Dis* 23:715–717.
- 397 12. Ariens EJ, Simonis AM. 1964. A molecular basis for drug action\*. *J Pharm Phar-*  
398 *macol* 16:137–157.
- 399 13. Davis TME, Hamzah J, Ilett KF, Karunajeewa HA, Reeder JC, Batty KT,  
400 Hackett S, Barrett PHR. 2006. *In vitro* interactions between piperazine, dihy-  
401 droartemisinin, and other conventional and novel antimalarial drugs. *Antimicrob*  
402 *Agents Chemother* 50:2883–2885.
- 403 14. Hodel EM, Kay K, Hastings IM. 2016. Incorporating stage-specific drug action  
404 into pharmacological modeling of antimalarial drug treatment. *Antimicrob Agents*  
405 *Chemother* 60:2747–56.
- 406 15. Hoshen MB, Na-Bangchang K, Stein WD, Ginsburg H. 2000. Mathematical mod-  
407 elling of the chemotherapy of *Plasmodium falciparum* malaria with artesunate: pos-

- 408 tulation of ‘dormancy’, a partial cytostatic effect of the drug, and its implication for  
409 treatment regimens. *Parasitology* 121:237–246.
- 410 16. Saralamba S, Pan-Ngum W, Maude RJ, Lee SJ, Tarning J, Lindegårdh N, Choti-  
411 vanich K, Nosten F, Day NPJ, Socheat D, White NJ, Dondorp AM, White LJ. 2011.  
412 Intrahost modeling of artemisinin resistance in *Plasmodium falciparum*. *Proc Natl*  
413 *Acad Sci* 108:397–402.
- 414 17. Zaloumis S, Humberstone A, Charman SA, Price RN, Moehrle J, Gamo-Benito  
415 J, McCaw J, Jansen KM, Smith K, Simpson JA. 2012. Assessing the utility of  
416 an anti-malarial pharmacokinetic-pharmacodynamic model for aiding drug clinical  
417 development. *Malar J* 11:303.
- 418 18. WHO. 2015. Guidelines for the treatment of malaria. World Health Organization.  
419 URL: <http://www.who.int/malaria/publications/atoz/9789241549127/en/>.
- 420 19. WHO. 2018. WHO malaria threats map: tracking biological challenges to malaria  
421 control and elimination. URL: <http://apps.who.int/malaria/maps/threats/>.
- 422 20. Price RN, Simpson JA, Teja-Isavatharm P, Than MM, Luxemburger C, Heppner  
423 DG, Chongsuphajaisiddhi T, Nosten F, White NJ. 1999. Pharmacokinetics of meflo-  
424 quine combined with artesunate in children with acute falciparum malaria. *Antimi-  
425 crob Agents Chemother* 43:341–346.
- 426 21. Lohy Das J, Dondorp AM, Nosten F, Phyto AP, Hanpithakpong W, Ringwald P,  
427 Lim P, White NJ, Karlsson MO, Bergstrand M, Tarning J. 2017. Population phar-  
428 macokinetic and pharmacodynamic modeling of artemisinin resistance in Southeast  
429 Asia. *AAPS J* 19:1842–1854.

- 430 22. Klonis N, Xie SC, McCaw JM, Crespo-Ortiz MP, Zaloumis SG, Simpson JA, Tilley  
431 L. 2013. Altered temporal response of malaria parasites determines differential sen-  
432 sitivity to artemisinin. *Proc Natl Acad Sci* 110:5157–62.
- 433 23. Dogovski C, Xie SC, Burgio G, Bridgford J, Mok S, McCaw JM, Chotivanich K,  
434 Kenny S, Gnädig N, Straimer J, Bozdech Z, Fidock DA, Simpson JA, Dondorp AM,  
435 Foote S, Klonis N, Tilley L. 2015. Targeting the cell stress response of *Plasmodium*  
436 *falciparum* to overcome artemisinin resistance. *PLOS Biol* 13:e1002132.
- 437 24. Cao P, Klonis N, Zaloumis S, Dogovski C, Xie SC, Saralamba S, White LJ, Fowkes  
438 FJI, Tilley L, Simpson JA, McCaw JM. 2017. A dynamic stress model explains the  
439 delayed drug effect in artemisinin treatment of *Plasmodium falciparum*. *Antimicrob*  
440 *Agents Chemother* 61:e00618–17.
- 441 25. Cao P, Klonis N, Zaloumis S, Khoury DS, Cromer D, Davenport MP, Tilley L, Simp-  
442 son JA, McCaw JM. 2017. A mechanistic model quantifies artemisinin-induced par-  
443 asite growth retardation in blood-stage *Plasmodium falciparum* infection. *J Theor*  
444 *Biol* 430:117–127.
- 445 26. Udomsangpetch R, Pipitaporn B, Silamut K, Pinches R, Kyes S, Looareesuwan S,  
446 Newbold C, White NJ. 2002. Febrile temperatures induce cytoadherence of ring-  
447 stage *Plasmodium falciparum*-infected erythrocytes. *Proc Natl Acad Sci* 99:11825–  
448 11829.
- 449 27. Ashley EA, Stepniewska K, Lindegårdh N, McGready R, Hutagalung R, Hae R,  
450 Singhasivanon P, White NJ, Nosten F. 2006. Population pharmacokinetic assess-  
451 ment of a new regimen of mefloquine used in combination treatment of uncompl-  
452 icated *falciparum* malaria. *Antimicrob Agents Chemother* 50:2281–5.

- 453 28. Jansen KM, Duffull SB, Tarning J, Lindegardh N, White NJ, Simpson JA. 2011.  
454 Optimal designs for population pharmacokinetic studies of oral artesunate in pa-  
455 tients with uncomplicated falciparum malaria. *Malar J* 10:181.
- 456 29. Tarning J, Ashley EA, Lindegardh N, Stepniewska K, Phaiphun L, Day NPJ,  
457 McGready R, Ashton M, Nosten F, White NJ. 2008. Population pharmacokinet-  
458 ics of piperazine after two different treatment regimens with dihydroartemisinin-  
459 piperazine in patients with *Plasmodium falciparum* malaria in Thailand. *Antimi-  
460 crob Agents Chemother* 52:1052–1061.
- 461 30. Chou TC. 2006. Theoretical basis, experimental design, and computerized simu-  
462 lation of synergism and antagonism in drug combination studies. *Pharmacol Rev*  
463 58:621–681.
- 464 31. Greco WR, Bravo G, Parsons JC. 1995. The search for synergy: a critical review  
465 from a response surface perspective. *Pharmacol Rev* 47.
- 466 32. Tallarida RJ. 2006. An overview of drug combination analysis with isobolograms. *J*  
467 *Pharmacol Exp Ther* 319.
- 468 33. Horn D, Duraisingh MT. 2014. Antiparasitic chemotherapy: from genomes to mech-  
469 anisms. *Annu Rev Pharmacol Toxicol* 54:71–94.
- 470 34. Loewe S. 1928. Die quantitativen probleme der pharmakologie. *Ergebnisse der Phys-  
471 iol* 27:47–187.
- 472 35. Bliss CI. 1939. The toxicity of poisons applied jointly. *Ann Appl Biol* 26:585–615.

- 473 36. Combrinck JM, Mabotha TE, Ncokazi KK, Ambele MA, Taylor D, Smith PJ, Hoppe  
474 HC, Egan TJ. 2013. Insights into the role of heme in the mechanism of action of  
475 antimalarials. *ACS Chem Biol* 8:133–137.
- 476 37. Davis TME, Hung TY, Sim IK, Karunajeewa HA, Ilett KF. 2005. Piperaquine.  
477 *Drugs* 65:75–87.
- 478 38. O’Neill PM, Barton VE, Ward SA. 2010. The molecular mechanism of action of  
479 artemisinin – the debate continues. *Molecules* 15:1705–1721.
- 480 39. Cravo P, Napolitano H, Culleton R. 2015. How genomics is contributing to the fight  
481 against artemisinin-resistant malaria parasites. *Acta Trop* 148:1–7.
- 482 40. Machado SG, Robinson GA. 1994. A direct, general approach based on isobolograms  
483 for assessing the joint action of drugs in pre-clinical experiments. *Stat Med* 13:2289–  
484 2309.
- 485 41. Carter WH, Gennings C, Staniswalis JG, Campbell ED, White KL. 1988. A statis-  
486 tical approach to the construction and analysis of isobolograms. *J Am Coll Toxicol*  
487 7:963–973.
- 488 42. Gennings C. 2000. On testing for drug/chemical interactions: definitions and infer-  
489 ence. *J Biopharm Stat* 10:457–467.
- 490 43. Plummer JL, Short TG. 1990. Statistical modeling of the effects of drug combina-  
491 tions. *J Pharmacol Methods* 23:297–309.
- 492 44. Berenbaum MC. 1985. The expected effect of a combination of agents: the general  
493 solution. *J Theor Biol* 114:413–431.



- 494 45. McKay MD, Beckman RJ, Conover WJ. 1979. Comparison of three methods for  
495 selecting values of input variables in the analysis of output from a computer code.  
496 *Technometrics* 21:239–245.
- 497 46. Simpson JA, Price R, Kuile F, Teja-Isavatharm P, Nosten F, Chongsuphajaisiddhi  
498 T, Looareesuwan S, Aarons L, White NJ. Population pharmacokinetics of meflo-  
499 quine in patients with acute falciparum malaria. *Clin Pharmacol Ther* 66:472–484.
- 500 47. Kuile FO ter, Nosten F, Luxemburger C, Kyle D, Teja-Isavatharm P, Phaipun L,  
501 Price R, Chongsuphajaisiddhi T, White NJ. 1995. Mefloquine treatment of acute fal-  
502 ciparum malaria: a prospective study of non-serious adverse effects in 3673 patients.  
503 *Bull World Health Organ* 73:631–42.
- 504 48. Drusano GL, D’Argenio DZ, Symonds W, Bilello PA, McDowell J, Sadler B, Bye  
505 A, Bilello JA. 1998. Nucleoside analog 1592u89 and human immunodeficiency virus  
506 protease inhibitor 141w94 are synergistic *in vitro*. *Antimicrob Agents Chemother*  
507 42:2153–2159.
- 508 49. Tallarida RJ. 2000. Drug synergism and dose-effect data analysis. Chapman &  
509 Hall/CRC.
- 510 50. White D, Slocum H, Brun Y, Wrzosek C, Greco W. 2003. A new nonlinear mixture  
511 response surface paradigm for the study of synergism: a three drug example. *Curr*  
512 *Drug Metab* 4:399–409.
- 513 51. White NJ. 1997. Assessment of the pharmacodynamic properties of antimalarial  
514 drugs *in vivo*. *Antimicrob Agents Chemother* 41:1413–1422.

- 515 52. Pasay CJ, Rockett R, Sekuloski S, Griffin P, Marquart L, Peatey C, Wang CYT,  
516 O'Rourke P, Elliott S, Baker M, Möhrle JJ, McCarthy JS. 2016. Piperaquine  
517 monotherapy of drug-susceptible *Plasmodium falciparum* infection results in rapid  
518 clearance of parasitemia but is followed by the appearance of gametocytemia. J  
519 Infect Dis 214:105–113.

## 520 Tables

521 **Table 1: The Kaplan-Meier estimation of the probabilities of cure on day 42 of**  
 522 **follow-up in some regions in South-East Asia where DHA-PQ is the first-line**  
 523 **treatment for malaria (19).**

|                     | Geographical Region |            |            |          |            |
|---------------------|---------------------|------------|------------|----------|------------|
|                     | Siem Pang           | Binh Phuoc | Bu Gia Map | Aoral    | Chi Kraeng |
| Probability of cure | 0.92                | 0.74       | 0.67       | 0.48     | 0.38       |
| Number of patients  | 60                  | 40         | 40         | 53       | 40         |
| Year                | 2015                | 2015       | 2015       | 2015     | 2014       |
| Country             | Cambodia            | Viet Nam   | Viet Nam   | Cambodia | Cambodia   |

524 **Table 2: Parameter values of the pharmacokinetic model.**

525 The mean values are shown along with the between-patient variabilities (presented as %  
 526 coefficient of variation) in brackets.

| PK parameter    | Drug            |               |                  | Description                      |
|-----------------|-----------------|---------------|------------------|----------------------------------|
|                 | DHA (28)        | MQ (27)       | PQ (29)          |                                  |
| $k_a$ [1/h]     | 0.82<br>(26.5%) | 0.29<br>(26%) | 0.717<br>(168%)  | absorption rate                  |
| $Cl/F$ [L/kg/h] | 1.01<br>(22.4%) | 0.03<br>(33%) | 1.38<br>(42%)    | clearance                        |
| $V/F$ [L/kg]    | 0.83<br>(50%)   | 10.2<br>(51%) | -                | volume of distribution           |
| $V_c/F$ [L/kg]  | -               | -             | 180.42<br>(101%) | volume of central compartment    |
| $Q/F$ [L/kg/h]  | -               | -             | 2.73<br>(85%)    | inter-compartmental clearance    |
| $V_p/F$ [L/kg]  | -               | -             | 500<br>(50%)     | volume of peripheral compartment |

527 **Table 3: Statistical distribution of the initial parasite burden and parameter**  
 528 **values of the PD model.**

| Parameter                 | Drug  | Distribution            | Description                                        |
|---------------------------|-------|-------------------------|----------------------------------------------------|
| $N_0$                     |       | $\log N(25.46, 1.13)$   | initial number of parasites                        |
| $\mu_{IPL}$               |       | $DU(4, 16)$             | mean of initial parasites age distribution (h)     |
| $\sigma_{IPL}$            |       | $DU(2, 8)$              | standard deviation of initial age distribution (h) |
| $PMF$                     |       | $TRI(8, 12, 10)$        | parasite multiplication factor (/48 h cycle)       |
| $E_{max}^*$               | DHA   | $TRI(0.49, 0.69, 0.59)$ | maximum killing effect                             |
|                           | PQ    | $TRI(0.19, 0.50, 0.35)$ |                                                    |
|                           | MQ    | $TRI(0.09, 0.43, 0.26)$ |                                                    |
| $EC_{50} [ng/mL]^\dagger$ | DHA   | $U(1.44, 532.05)$       | concentration producing $E_{max}/2$ effect         |
|                           | PQ    | $U(11.56, 94.19)$       |                                                    |
|                           | MQ    | $U(20.48, 1087.22)$     |                                                    |
| $\gamma$                  | DHA   | $\log N(1.31, 0.65)$    | sigmoidicity of the concentration-effect curves    |
|                           | PQ    | $\log N(1.35, 0.66)$    |                                                    |
|                           | MQ    | $\log N(0.97, 0.54)$    |                                                    |
| $\alpha$                  | PQ-MQ | $TRI(1, 16, 3.3)$       | interaction parameter                              |

529  $TRI(l, h, m)$ : triangular distribution with peak at  $m$ , lower limit of  $l$  and higher limit of  
 530  $h$ .

531  $DU(l, h)$ : discrete uniform distribution with lower and higher limits  $l$  and  $h$ , respectively.

532  $U(l, h)$ : continuous uniform distribution with lower and higher limits  $l$  and  $h$ , respectively.

533  $\log N(\mu, \sigma)$ : log-normal distribution derived from a normal distribution with mean  $\mu$  and  
 534 standard deviation  $\sigma$ .

535 killing windows of the drugs are as follows (17):  $W_D = [6\ 44]$ ,  $W_P = [12\ 36]$  and  $W_M =$   
 536  $[18\ 40]$

537 \* see Supplementary Material 3 for further details

538 † the lower limit of the distribution of  $EC_{50}$  is chosen to be the *in vitro*  $IC_{50}$  of free drug,  
 539 obtained by adjusting for the *in vitro* drug bindings. The higher limit is chosen to be  
 540 half of the maximum drug concentration of the median of the PK profiles (17).

## 541 **Figure legends**

### 542 **Figure 1: Model simulation.**

543 a) PK model results; the concentrations of DHA (blue), PQ (red), MQ (black) are de-  
544 picted. The shaded regions show the area between the 2.5th and 97.5th percentiles of  
545 the results generated for 1000 patients. b) PD model results for 100 randomly selected  
546 patients; the horizontal line shows the microscopic level of detection of parasites. c)  
547 Kaplan-Meier estimation of the probability of survival over 42 days of follow-up.

### 548 **Figure 2: Resistance manifestations.**

549 Resistance of parasites to drugs, modelled by relevant alterations of the parameters of the  
550 model. A concentration-effect profile of susceptible parasites (black) can be right-shifted,  
551 *i.e.*  $EC_{50}$  increases (red), and/or the maximum killing effect,  $E_{max}$ , decreases (blue).

### 552 **Figure 3: The probability of cure on day 42 of follow-up when $EC_{50}$ of PQ** 553 **varies over the deciles of [11 94].**

554 (a) Sensitivity and (b) resistance to DHA. Blue: ACT treatment — dosing regimens of  
555 PQ and DHA are 18.0 mg/kg and 4.0 mg/kg, respectively, on days 1, 2 and 3. Purple:  
556 a single dose of 8.3 mg/kg of MQ is added on day 3. Black: two 8.3 mg/kg doses of MQ  
557 on days 2 and 3 are added. Red: three 8.3 mg/kg doses of MQ are added on days 1, 2,  
558 3. The top labels show the geographical regions in South-East Asia (Table 1) that have  
559 observed DHA-PQ cure rates equal to the corresponding simulated values. Error bars  
560 show the 95% confidence intervals of Kaplan-Meier analysis.

### 561 **Figure 4: The influence of antagonism between PQ and MQ on the efficacy** 562 **of the TACT.**

563 (a) Dashed and solid lines represent combined killing effect,  $E$ , for  $\alpha = 3.3$  and  $\alpha = 1$ ,  
564 respectively. (b) The probability of cure on day 42 of follow-up versus the interaction  
565 parameter,  $\alpha$ , when the resistance level corresponding to Chi Kraeng is considered, *i.e.*  
566  $EC_{50,PQ} \in (69, 78]$ ; resistance to DHA is assumed. Different values of interaction pa-  
567 rameter,  $\alpha$ , produce synergism ( $0 < \alpha < 1$ ), zero-interaction ( $\alpha = 1$ ) and antagonism  
568 ( $1 < \alpha < \infty$ ) in the combined effect of PQ-MQ. The interpretation of the colors is  
569 explained in the caption of Fig. 3.

570 **Figure 5: Interaction between PQ and MQ and their combined effect.**

571 (a) Isobologram presented in (13) showing an strong antagonistic interaction between PQ  
572 and MQ. The dashed and solid lines show the zero-interaction isobole and our fitted curve  
573 to the data points (estimated PQ-MQ interaction parameter is  $\alpha = 3.3$ ), respectively.  
574  $C_M^* = C_M/EC_{50,M}$  and  $C_P^* = C_P/EC_{50,P}$  are the normalised concentrations of MQ and  
575 PQ, respectively. (b) Combined effect of PQ and MQ, *i.e.*  $E_{PM}$  (the  $C_M^*$  and  $C_P^*$  axes are  
576 log-scaled), when PQ-MQ interaction parameter ( $\alpha$ ) equals 3.3. The maximum killing  
577 effects and sigmoidicity of PQ and MQ are considered equal (*i.e.*  $E_{max,P} = E_{max,M} = 0.3$   
578 and  $\gamma_P = \gamma_M = 3$ ) throughout the model fitting to conform with the data provided by  
579 Davis et al. (2006) (13).

## Figures

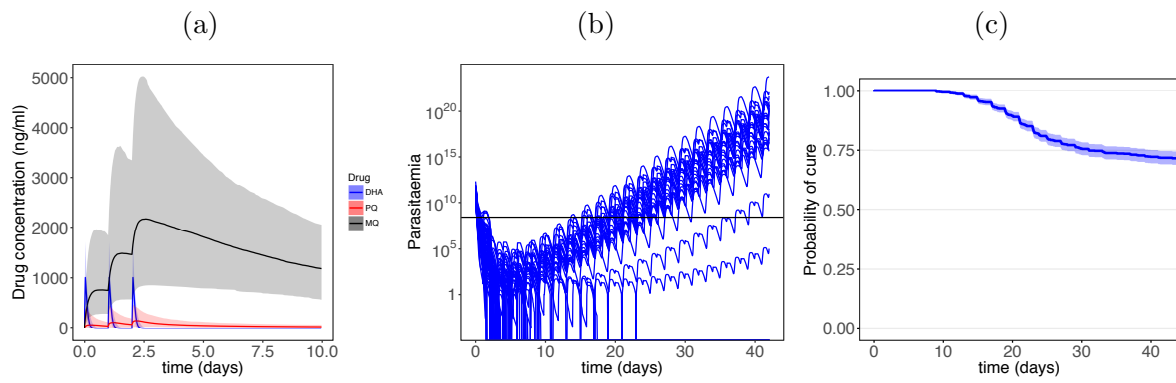

Figure 1

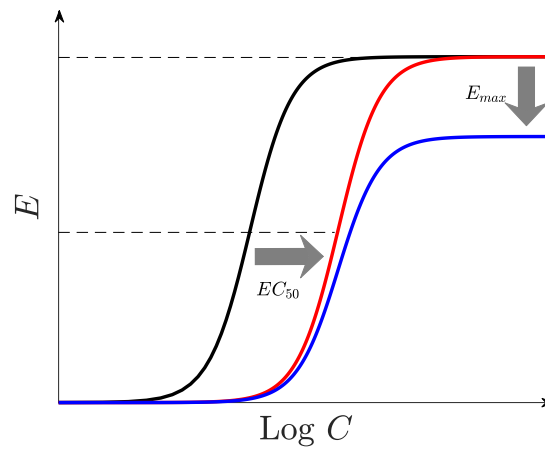

Figure 2

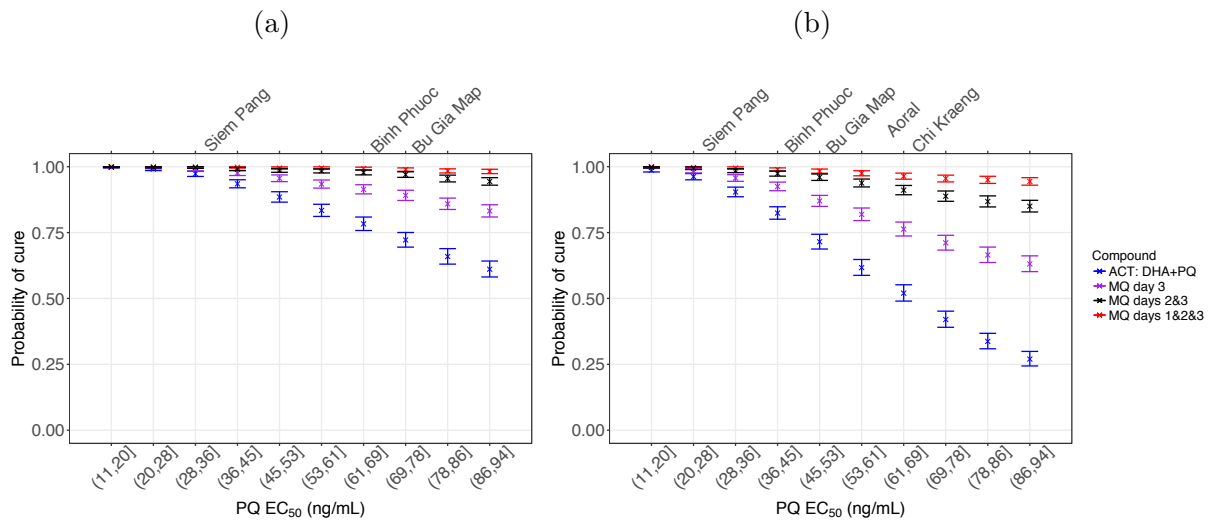

Figure 3

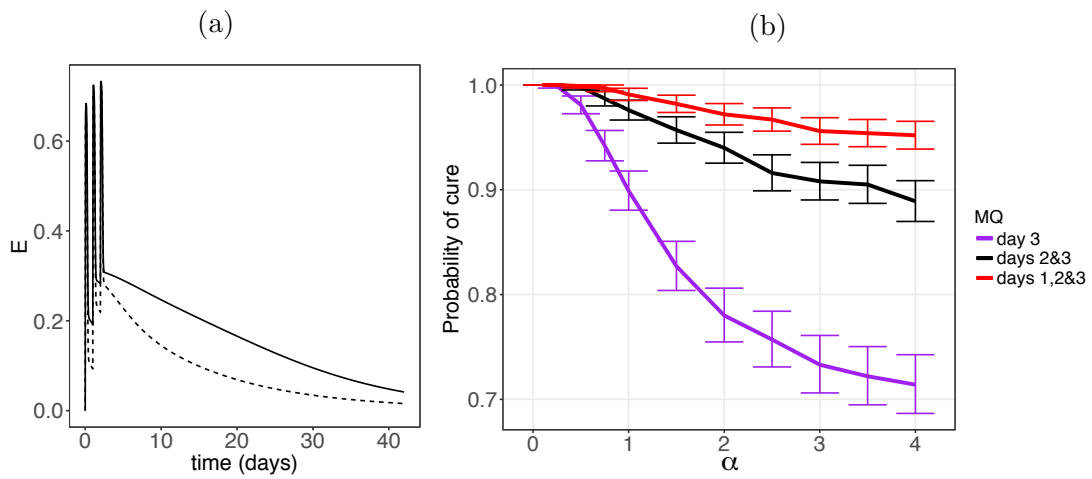

Figure 4



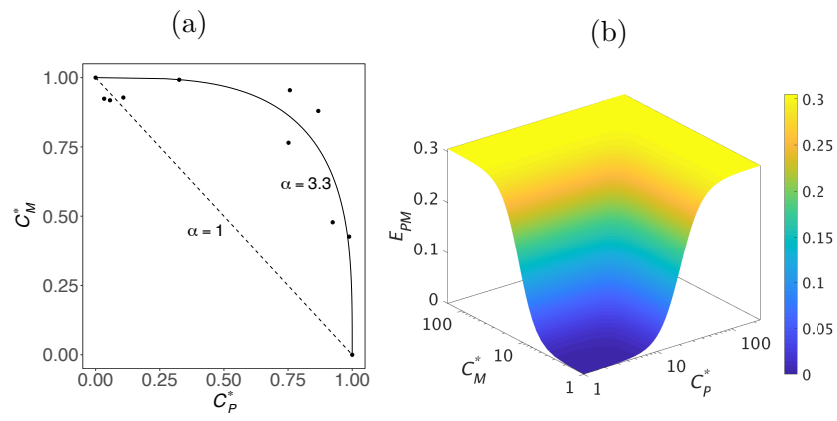

Figure 5

# Supplementary Materials

## 1 Other manifestations of resistance

### 1.1 Maximum killing effect, $E_{max}$

Here we examine the probability of cure on day 42 of follow-up when  $E_{max}$  is the resistance manifestation. Fig. S1 shows the results when  $E_{max,P}$  varies across the deciles of its sampling interval; samples are taken from uniform distributions over each decile. Similar to the results of Section “Resistance to DHA”, adding one dose of MQ to the ACT (blue curve) can increase the probability of cure, but is not sufficient. In order to reach the probability of cure of above 90% for all of the deciles, we need three doses of MQ. Of interest, the magnitude of the effect of resistance on probability of cure in this case is close to that of  $EC_{50}$ ; resistance to DHA is also considered, *i.e.*  $EC_{50,D} \in (50, 100]$ .

### 1.2 Killing window, $W$

We now shorten the size of killing window,  $W$ , of PQ for the intra-erythrocytic parasite life cycle, by increasing the lower limit of the  $W$  and fixing the higher limit. The results for the ACT show that shortening the killing window can significantly reduce the probability of cure, but again, adding MQ to the compound can pull up the probabilities of cure. To achieve a probability of cure of at least 90%, three 8.3 mg/kg doses of MQ are required.

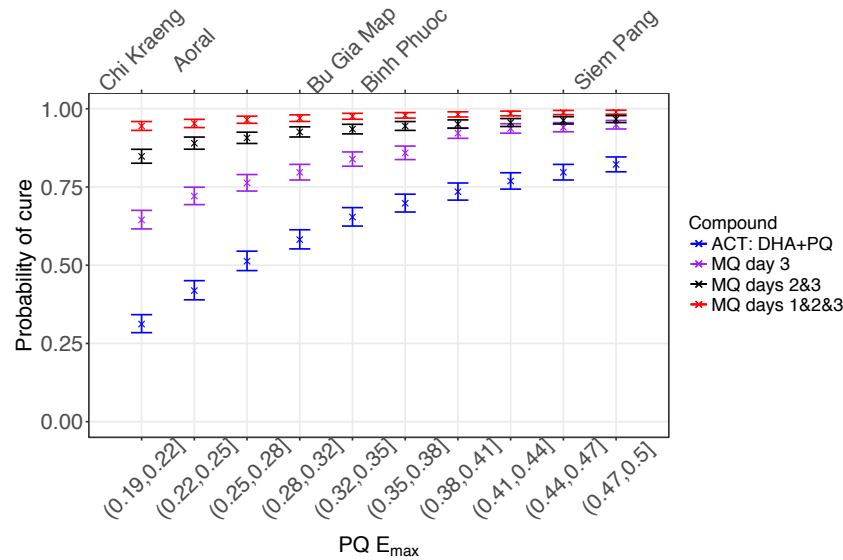

Figure S1: The probability of cure on day 42 of follow-up when  $E_{max}$  of PQ varies over the deciles of (0.19, 0.50].

Dosing regimens of PQ and DHA are 18.0 mg/kg and 4.0 mg/kg, respectively, on days 1, 2 and 3. Purple: a single dose of 8.3 mg/kg of MQ is added on day 3. Black: two 8.3 mg/kg doses of MQ on days 2 and 3 are added. Red: three 8.3 mg/kg doses of MQ are added on days 1, 2, 3. The top labels show the geographical regions in South-East Asia (Table 1) that have observed DHA-PQ cure rates equal to the corresponding simulated values. Error bars show the 95% confidence intervals of Kaplan-Meier analysis.

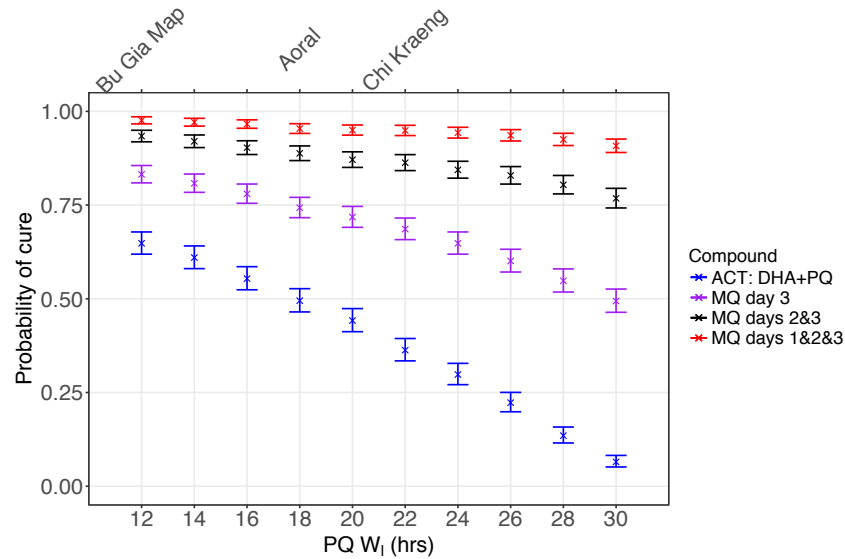

Figure S2: The probability of cure at day 42 of follow-up when the size of the parasite killing window ( $W$ ) for PQ is reduced by increasing the lower limit,  $W_l$ , from 12 to 30.

The higher limit,  $W_u$ , is constant and equal to 36 hours. Purple: a single dose of 8.3 mg/kg of MQ is added on day 3. Black: two 8.3 mg/kg doses of MQ on days 2 and 3 are added. Red: three 8.3 mg/kg doses of MQ are added on days 1, 2, 3. The top labels show the geographical regions in South-East Asia (Table 1) that have observed DHA-PQ cure rates equal to the corresponding simulated values. Error bars show the 95% confidence intervals of Kaplan-Meier analysis.

## 2 Modelling combined killing effect

### 2.1 Models of drug interaction

There are two prominent empirical approaches for modelling zero-interaction: *Loewe additivity* (34) and *Bliss independence* (35). Loewe additivity is based on the idea that two non-interacting drugs differ only in their potency, and was originally formulated as

$$1 = \frac{C_1}{c_1} + \frac{C_2}{c_2}, \quad (2.1)$$

where  $c_1$  and  $c_2$  are the concentrations of drugs 1 and 2, respectively, that each individually (*i.e.* not in combination) produces a specified effect  $E_{12}$ , and  $C_1$  and  $C_2$  are the drug concentrations in a combination that together produce  $E_{12}$  — for brevity, the formulae are defined for two drugs, but they can be readily extended for multiple drugs. Eqn. (2.1) is known as a *linear isobole*, which is widely used in pharmacology and toxicology as a reference to identify drug interactions. Loewe first put forward this model, which was then investigated more rigorously by Berenbaum (1985) and others.

Loewe additivity is suggested to be a suitable concept for zero-interaction when the combined drugs have similar modes of action (31, 32). However, when the drugs are believed to act independently, Bliss independence is more appropriate. This model is based on a probabilistic perspective, defined as

$$E_{12} = E_1 + E_2 - E_1 E_2 \quad (2.2)$$

where  $E_1$  and  $E_2$  are the individually produced effects by drugs 1 and 2, respectively.

Ultimately, deviations from a selected zero-interaction reference model would determine the degree of synergistic/antagonistic interaction in certain drug combinations. Note that despite the fundamental differences of Loewe additivity and Bliss independence, it has been shown that they indicate the same nature of drug interactions in the majority of cases (48).

## 2.2 Combined effect of DHA-PQ-MQ

Statistical models can be used to define  $E_{PM}$ , *e.g.* Carter et al. (1988) used a generalised linear model with the logit link function:

$$\log\left(\frac{E_{PM}}{1-E_{PM}}\right) = \beta_0 + \beta_1 C_P + \beta_2 C_M + \beta_3 C_P C_M,$$

where  $C_P$  and  $C_M$  are the concentrations of PQ and MQ, respectively, and  $\beta_0, \dots, \beta_3$  are the coefficients of the model. Similar statistical models can be found in (42, 43).

Another set of models include only one parameter to incorporate the effect of interaction (31, 40, 32). These models are more specified to the framework of drug interaction, in contrast to the statistical models. Here, we focus on the models with one parameter of interaction — noting that statistical models are shown to be readily transformable to these models, *e.g.* see (41).

One of the most frequently used models to describe the combined effect is Greco's

model (31), defined by

$$1 = \frac{C_P}{EC_{50,P} \left( \frac{E_{PM}}{E_{max,P} - E_{PM}} \right)^{\frac{1}{\gamma_P}}} + \frac{C_M}{EC_{50,M} \left( \frac{E_{PM}}{E_{max,M} - E_{PM}} \right)^{\frac{1}{\gamma_M}}} + \frac{\alpha C_P C_M}{EC_{50,P} EC_{50,M} \left( \frac{E_{PM}}{E_{max,P} - E_{PM}} \right)^{\frac{1}{2\gamma_P}} \left( \frac{E_{PM}}{E_{max,M} - E_{PM}} \right)^{\frac{1}{2\gamma_M}}} \quad (2.3)$$

where the subscripts  $P$  and  $M$  denote which drug the parameters correspond to. The interaction parameter,  $\alpha$ , incorporates the influence of the interaction between the drugs, where, for Eqn. (2.3),  $\alpha = 0$ ,  $-1 < \alpha < 0$  and  $\alpha > 0$  produce zero-interaction, antagonism and synergism, respectively. Note that we should have  $E_{PM} < E_{max,P}$  and  $E_{PM} < E_{max,M}$ , otherwise, Eqn. (2.3) would not yield a real-valued solution for  $E_{PM}$ . These conditions thus limit the utility of Greco's model to cases where  $E_{max,P} \neq E_{max,M}$ .

Tallarida (2006) put forward a broader framework based on the Loewe additivity, from which Greco's model can be derived as a special case. In addition, it overcomes the aforementioned limitation on the values of  $E_{PM}$ . In Tallarida's approach, we first identify the more potent drug, say PQ; this can be done by carrying out *in vitro* susceptibility tests or comparing the parasite reduction ratios derived from clinical efficacy studies. Then, we find the concentration of PQ that is equally effective as MQ at concentration  $C_M$ , using

$$C_{eq,M} = E_P^{-1}(E_M(C_M)),$$

where  $E_P^{-1}$  is the inverse function of  $E_P$ , given by

$$E_P^{-1}(x) = EC_{50,P} \left( \frac{x}{E_{max,P} - x} \right)^{\frac{1}{\gamma_P}},$$

Then, the zero-interaction model is obtained via

$$E_{PM} = E_{max,P} \frac{C_{PM}^{\gamma_P}}{C_{PM}^{\gamma_P} + EC_{50,P}^{\gamma_P}},$$

where

$$C_{PM} = C_P \mathbf{1}_{W_P}(a) + C_{eq,M} \mathbf{1}_{W_M}(a). \quad (2.4)$$

Subsequently, Eqn. (2.4) can be modified to accommodate an interaction between drugs. For example, Tallarida (2000) suggests changing this equation to  $C_{PM}/\alpha$ , where  $\alpha$  is the interaction parameter. However, we dismiss this method as it does not produce the observed antagonistic isoboles (see Fig. 5), hence, it will not provide a good fit to data. In order to obtain a form of  $E_{PM}$  similar to Greco's model, Eqn. (2.3), we then modified Eqn. (2.4) to incorporate the effect of an interaction between drugs. Adding  $\alpha C_P C_{eq,M}$  as an extra term to this equation provides a good fit to the data for  $\alpha = -0.132$ , but, the resultant  $E_{PM}$  is non-monotonic, which is biologically infeasible. We also tried other terms such as  $\alpha \sqrt{C_P C_{eq,M}}$ , but they similarly failed to give either a good fit or a monotonic effect. Hence, the models of form Eqn. (2.3) did not produce an appropriate  $E_{PM}$ , as also outlined by White et al. (2003) and Machado, Robinson (1994).

We then turned to using the model introduced by Machado, Robinson (1994):

$$C_{PM} = (C_P^\alpha \mathbf{1}_{W_P}(a) + C_{eq,M}^\alpha \mathbf{1}_{W_M}(a))^{\frac{1}{\alpha}},$$

where zero-interaction is produced when  $\alpha = 1$ . The values of  $1 < \alpha < \infty$  and  $0 < \alpha < 1$  produce antagonism and synergism, respectively. The model provides a good fit to the



data (see Fig. 5a), and importantly, a biologically feasible killing effect,  $E_{PM}$  (see Fig. 5b). Therefore, we selected this model for  $E_{PM}$ , and used it in the combined effect, Eqn. (1), of the TACT.

To conform with the data provided by Davis et al. (2006) (13), the maximum killing effects and sigmoidicity of PQ and MQ are considered equal (*i.e.*  $E_{max,P} = E_{max,M} = 0.3$  and  $\gamma_P = \gamma_M = 3$ ) throughout the model fitting. However, the considered range of variation for  $\alpha$  in the simulations is significantly larger than the potential variations due to  $E_{max,P} \neq E_{max,M}$  and/or  $\gamma_P \neq \gamma_M$ , hence, these assumptions do not invalidate the results (see Table 3).

### 3 Calculating $E_{max}$ using the parasite reduction ratio (PRR)

We are interested in finding how  $E_{max}$  is related to the parasite reduction ratio (PRR).

We can estimate PRR by

$$PRR = \frac{N_0}{\sum_{a=1}^{48} N(a, t_0 + T)}$$

where  $T$  is the time when we count the number of parasites (*e.g.*  $T = 48$  hrs) to calculate PRR, and  $N_0$  is the initial number of parasites at time  $t_0$ . Then, we have

$$\sum_{a=1}^{48} N(a, t_0) \prod_{\tau=0}^{T-1} (1 - E(a_\tau, t_0 + \tau)) = \frac{N_0}{\text{PMF} \times \text{PRR}},$$

where  $a_\tau = [(a + \tau) \bmod 48]$ . Thus, we use numerical methods to solve the above equation for  $E_{max}$ . The estimated  $E_{max}$  values are listed in Table 3. Note that it is extremely important to take account of the details of the clinical efficacy studies, by which the PRRs of the drugs are obtained. We used the following PRRs and the dosing regimens to estimate  $E_{max}$  for each drug:

- $PRR_{DHA} = 10^4$ : seven 2 mg/kg doses of DHA are administered (51).
- $PRR_{PQ} = 2951$ : one 14.1 mg/kg dose of PQ is administered (52).
- $PRR_{MQ} = 100$ : one 25 mg/kg dose of MQ is administered (51).

The obtained  $E_{max}$  is then used as the median of the triangular distribution (see Table 3), and the lower and higher limits of the distribution are found by

$$E_{max,l} = E_{max} - \frac{\log(50)}{\|W\|},$$
$$E_{max,h} = E_{max} + \frac{\log(50)}{\|W\|},$$

where  $\|W\|$  is the size of killing window of the drug (17).
